# Supplementary material for: Augmin shapes the anaphase spindle for efficient cytokinetic furrow ingression and abscission
Source: PubMed Central journal article supplement — Mol Biol Cell. 2016 Mar 1;27(5):812–27. doi: 10.1091/mbc.E15-02-0101 (PMC4803307; doi:10.1091/mbc.e15-02-0101), 2016-03-01
Supplement: supp_E15-02-0101v1_CombinedSupMats.pdf [file supp_E15-02-0101v1_CombinedSupMats.pdf]

# Supplemental Materials

*Molecular Biology of the Cell*

Uehara et al.

Figure S1

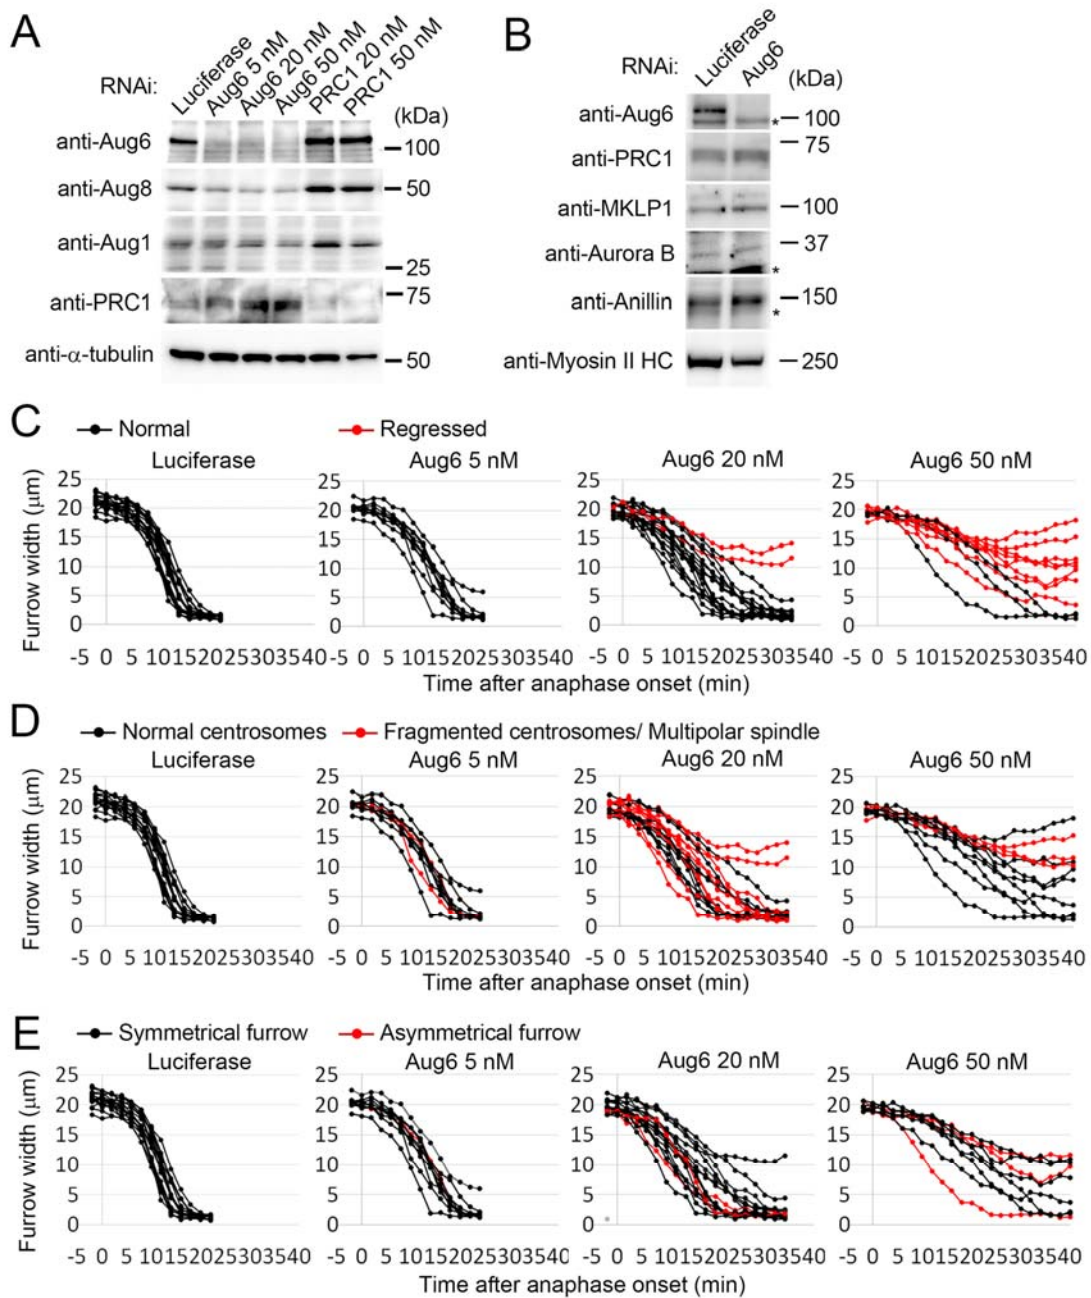

## Figure S1 (continued)

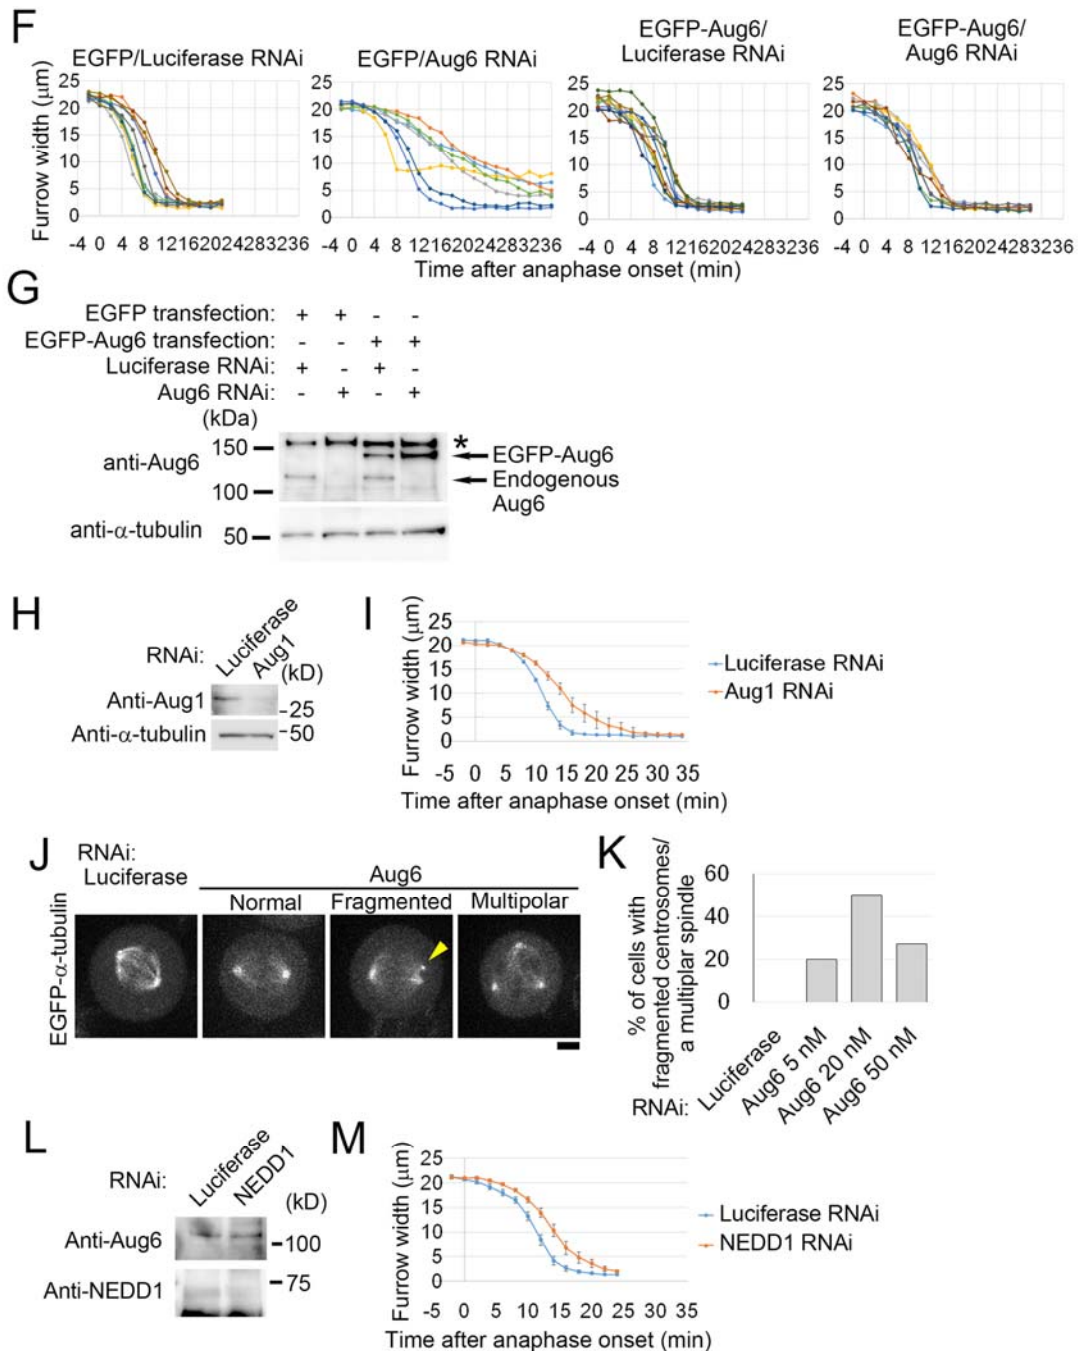

### Figure S1: Cytokinesis defects caused by augmin or NEDD1 depletion

(A, B) Immunoblotting against RNAi-treated HeLa cell extracts using antibodies against augmin subunits, PRC1 or  $\alpha$ -tubulin(A), or against various cytokinesis regulators (B). Asterisk indicates non-specific signals. (C-E) Raw data for the time plot shown in

Figure 1**F**. Data points derived from cells that regressed during furrow ingression (**C**), that had fragmented centrosomes or a multipolar spindle (**D**), or that showed asymmetrical furrow ingression (**E**) are shown in red. Note that data points from cells that regressed too early to judge their symmetry were omitted in **E**. (**F**) Raw data for the time plot shown in Figure 1**H**. (**G**) Immunoblotting against the extracts from RNAi-treated HeLa cells expressing EGFP or an RNAi-resistant version of EGFP-Aug6 using antibodies against Aug6 or  $\alpha$ -tubulin (as a loading control). Asterisk indicates non-specific signals. (**H**, **L**) Immunoblotting against RNAi-treated HeLa cell extracts using an anti-Aug1 antiserum (**H**), or anti-NEDD1 antibodies and anti-Aug6 antiserum (**L**). (**I**, **M**) Time plot of furrow width change in control and Aug1-depleted (**I**) or NEDD1-depleted (**M**) EGFP- $\alpha$ -tubulin cells. Mean  $\pm$  SE of  $\geq 7$  cells from two independent experiments (**I**), or  $\geq 11$  cells from three independent experiments per condition (**M**). (**J**) Examples of spindle pole disorganization observed in Aug6-depleted EGFP- $\alpha$ -tubulin cells. The yellow arrowhead indicates a centrosome fragment. Scale bar, 5  $\mu$ m. (**K**) Frequencies of spindle pole disorganization in RNAi-treated EGFP- $\alpha$ -tubulin cells. At least 10 cells from two independent experiments per condition were analyzed.

## Figure S2

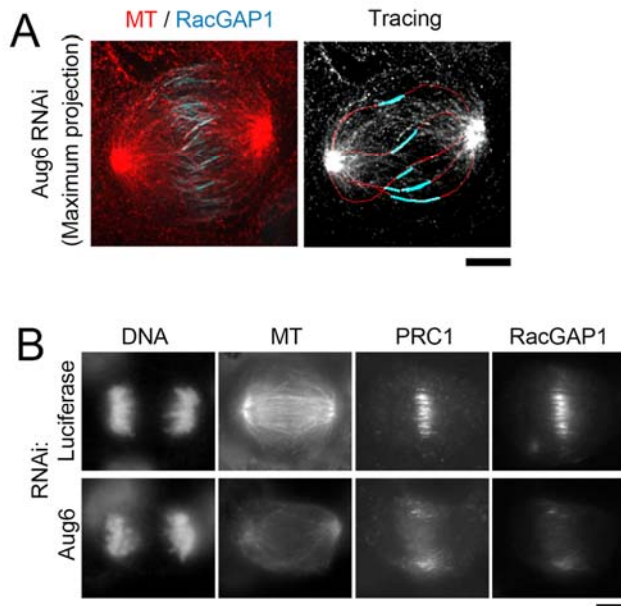

### Figure S2: Astral MT bundles form in Aug6-depleted cells

(A) Left: Maximum projected images of immunostaining for RacGAP1 and MTs in an Aug6-depleted early anaphase cell. Right: tracing of MT antiparallel bundles (MT bundles in red, RacGAP1 positive regions in cyan). (B) Immunostaining of MTs, PRC1,

and RacGAP1, and staining of chromosomes by DAPI in control or Aug6-depleted cells. Scale bars, 5  $\mu$ m.

Figure S3

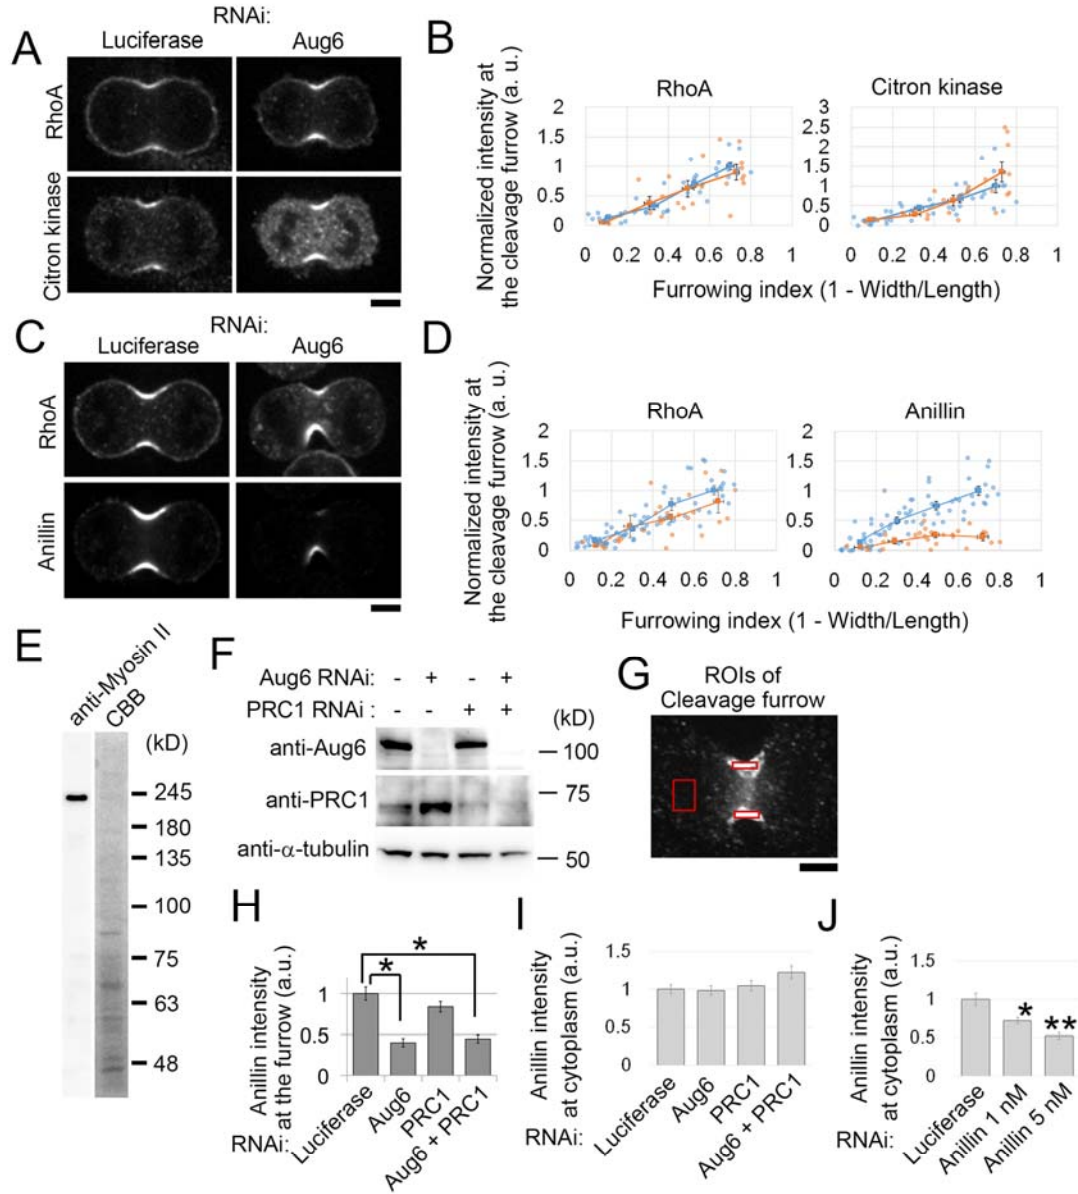

Figure S3 (continued)

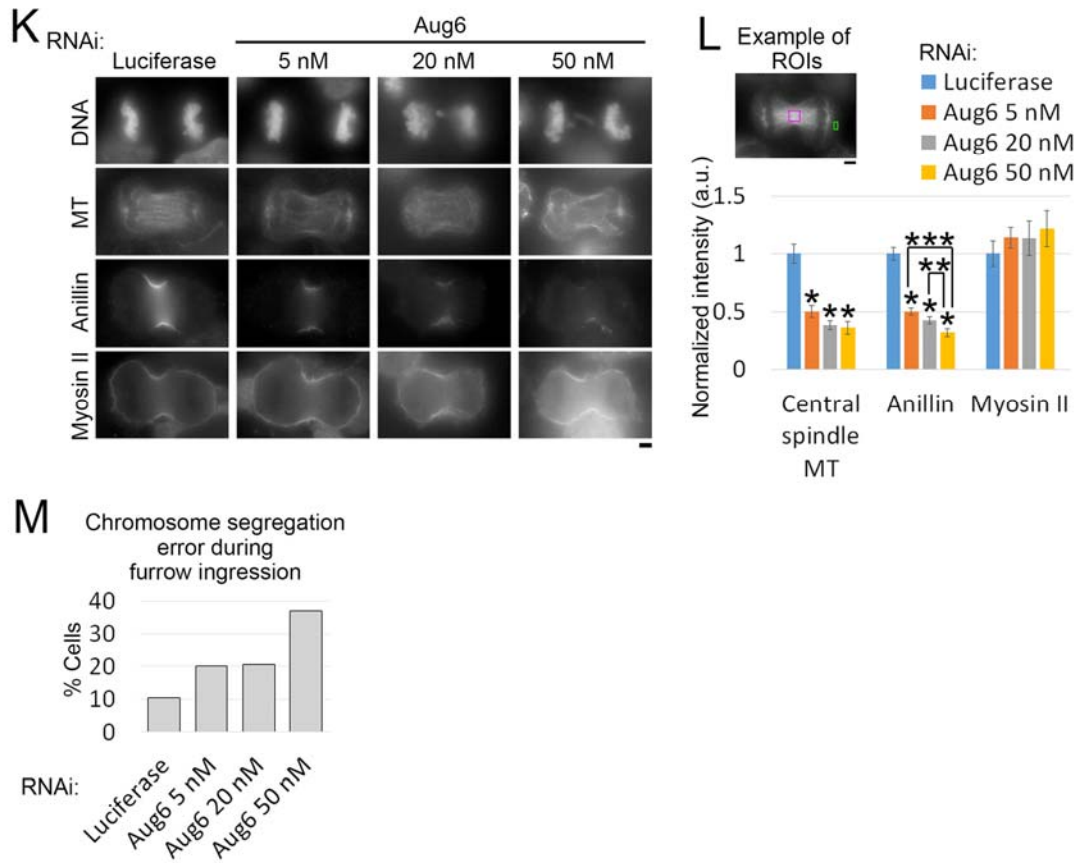

**Figure S3: Specific mislocalization of anillin in Aug6-depleted cells**

(A-D) Co-immunostaining of RhoA with citron kinase (A), or anillin (C) in control or Aug6-depleted cells. Quantification of signal intensity of RhoA and citron kinase (B), or anillin(D) at the cleavage furrow was carried out as described in Figure 3F. At least 22

cells (B), or  $\geq 26$  cells (D) from two independent experiments per condition were analyzed. (E) Immunoblotting against HeLa cell extracts using an anti-myosin IIA heavy chain antiserum. (G) Example of the ROIs used for quantification shown in Figures 4B, S3H-J, and S5B. (H) Normalized intensity of anillin staining at the cleavage furrow in RNAi-treated cells. Mean  $\pm$  SE of  $\geq 12$  cells from two independent experiments per condition. Asterisks indicate statistically significant differences ( $p < 0.001$ ,  $t$ -test). (I, J) Normalized intensity of anillin in the cytoplasm in RNAi-treated cells. Mean  $\pm$  SE of  $\geq 13$  (I) or  $\geq 10$  cells (J) from two independent experiments per condition. The cytoplasmic level of anillin was significantly decreased following depletion of anillin (\*,  $p < 0.01$ ; \*\*,  $p < 10^{-5}$ ,  $t$ -test) (J), whereas it remained unchanged following depletion of either Aug6 or PRC1 (I). (K) Co-immunostaining of anillin, myosin IIA and  $\alpha$ -tubulin in cells treated with various concentrations of Aug6 siRNA. (L) Normalized intensity of anillin and myosin IIA immunostaining at the cleavage furrow and that of  $\alpha$ -tubulin at the cell center (central spindle MT) in the cells shown in K. For quantification of central spindle MT intensity, immunostaining signals of  $\alpha$ -tubulin (magenta box) were subtracted by the cytoplasmic background (green box) (top). Anillin and myosin IIA signals at the cleavage furrow were quantified as described in Figure 3E. Mean  $\pm$  SE of  $\geq 24$  cells from two independent experiments per condition. Asterisks indicate statistically significant differences from control or between the indicated conditions (\*  $p < 10^{-5}$ , \*\*  $p < 0.05$ , \*\*\*  $p < 10^{-5}$ ,  $t$ -test). (M) Frequencies of chromosome segregation defects observed in the cells shown in K. At least 27 cells from two independent experiments per condition were analyzed.



**Figure S4**

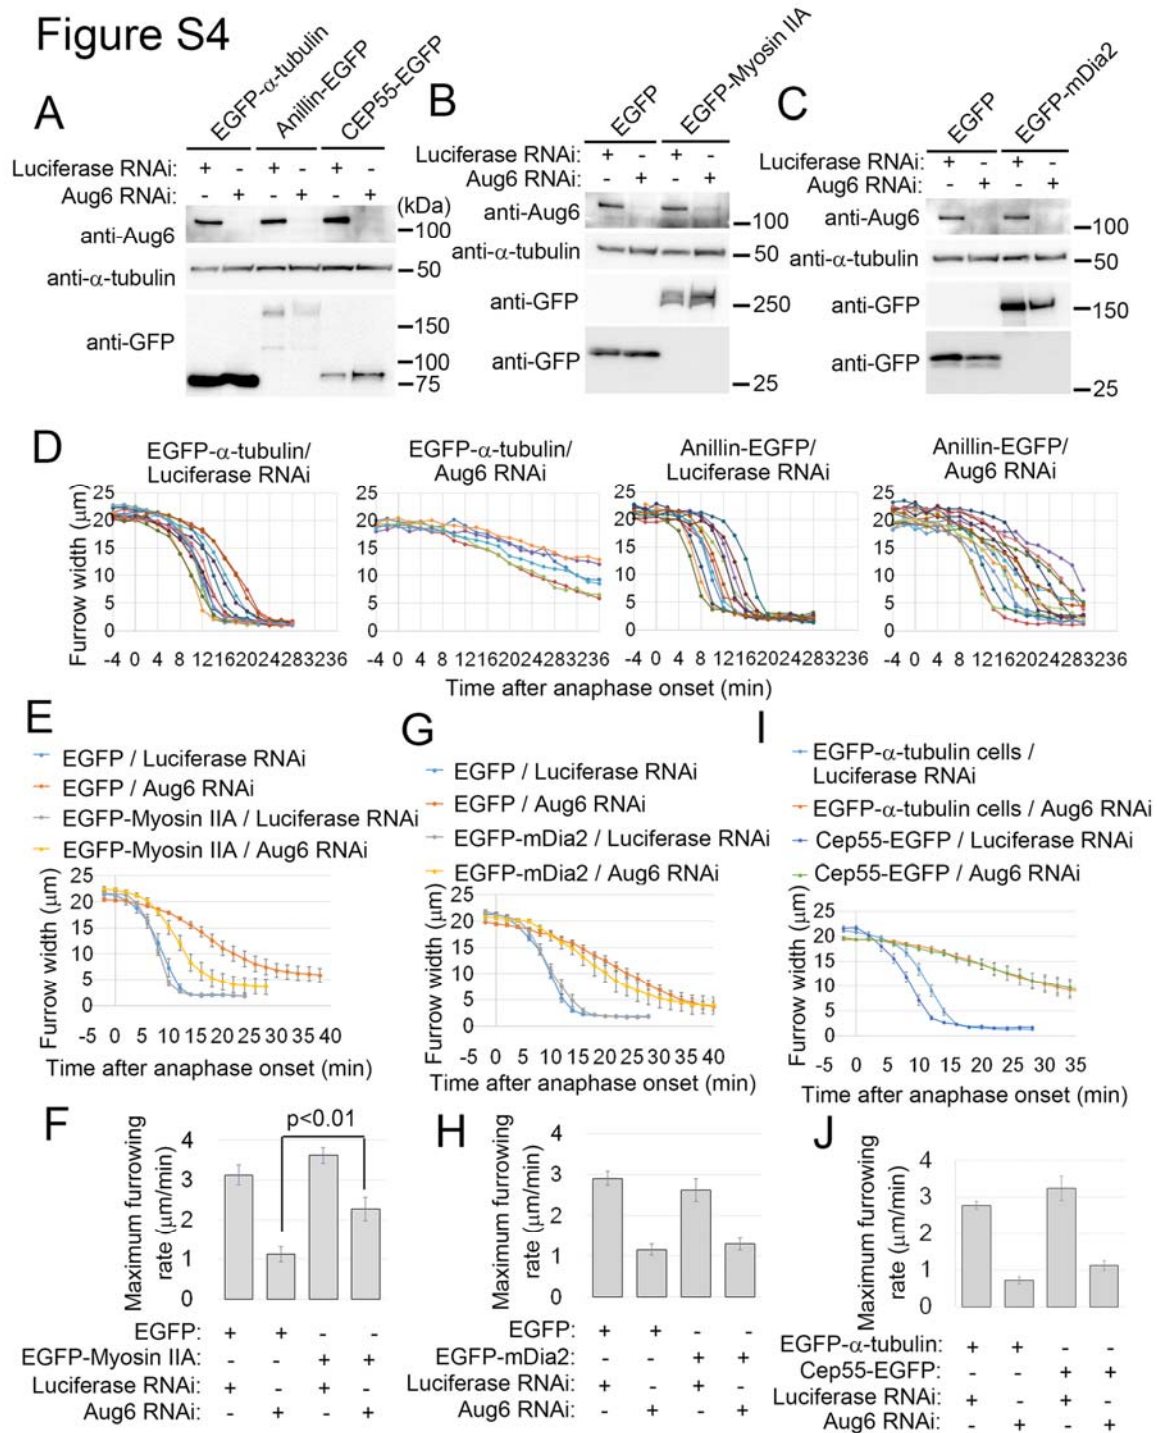

**Figure S4: Effects of exogenous expression of various cell division regulators on the progression of cytokinesis in augmin-depleted cells**

(A-C) Immunoblotting against extracts of RNAi-treated cells expressing EGFP- $\alpha$ -tubulin, anillin-EGFP, EGFP-Cep55 (A), or EGFP, EGFP-myosin IIA (B), or EGFP-

mDia2 (C) using antibodies against Aug6 or GFP. Endogenous  $\alpha$ -tubulin protein was used as a loading control. (D) Raw data for the time plot shown in Figure 4C. (E-J) Time plot of furrow width change (E, G, I) and maximum furrowing rate (F, H, J) in RNAi-treated cells expressing EGFP or EGFP-myosin IIA (E and F), EGFP or EGFP-mDia2 (G and H), or EGFP- $\alpha$ -tubulin- or Cep55-EGFP (I and J). Mean  $\pm$  SE of  $\geq 6$  cells from two independent experiments (p value of the *t*-test) (E and F),  $\geq 7$  cells from two independent experiments (G and H), or  $\geq 7$  cells from three independent experiments per condition (I and J).

Figure S5

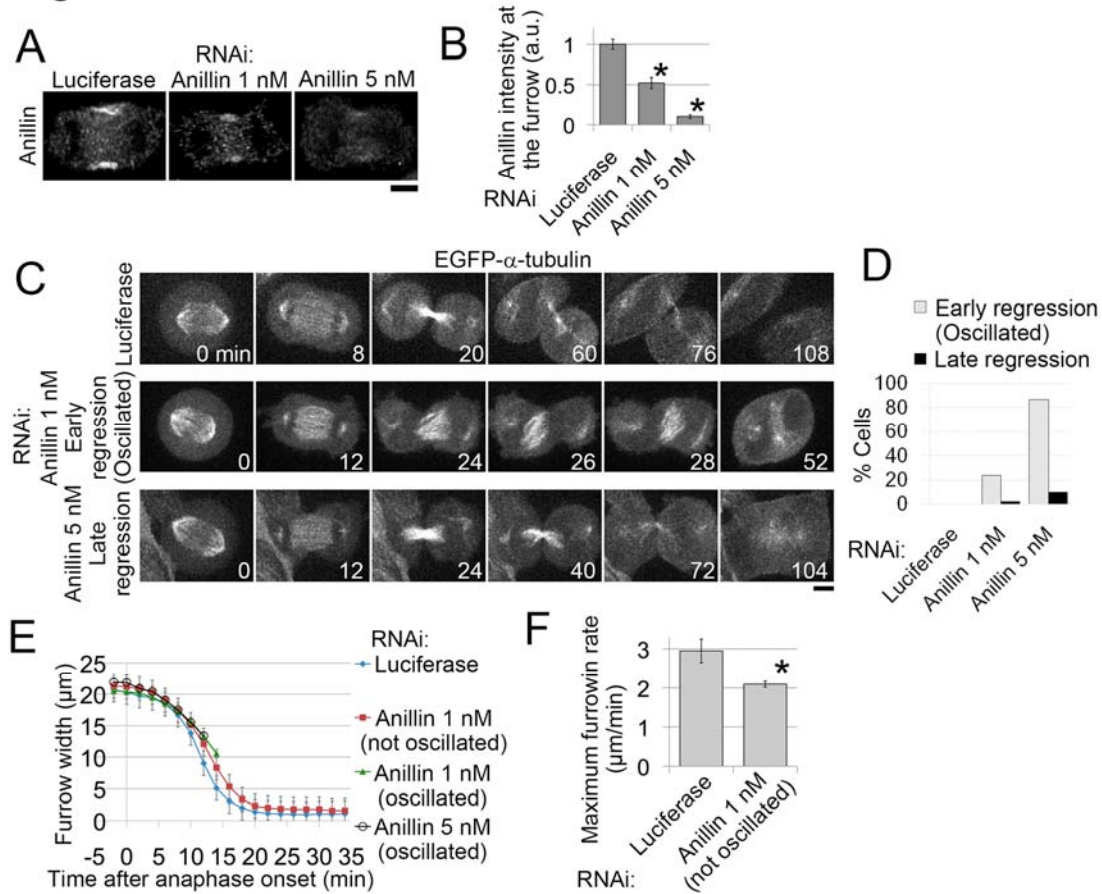

**Figure S5: Cytokinesis defects in anillin-depleted cells**

(A) Immunostaining for anillin in control and anillin-depleted cells. (B) Normalized intensity of anillin at the cleavage furrow. Mean  $\pm$  SE of  $\geq 10$  cells from two independent experiments per condition. Asterisks indicate statistically significant differences from

control cells ( $p < 0.001$ ,  $t$ -test). **(C)** Time lapse images of control or anillin-depleted EGFP- $\alpha$ -tubulin cells. Examples of cells that regressed during furrow ingression (early regression) or after furrow closure (late regression) are shown. Time after the onset of anaphase is indicated. **(D)** Frequencies of cytokinesis defects in control or anillin-depleted cells. At least 13 cells from three independent experiments per condition were analyzed. **(E, F)** Time plot of furrow width change **(E)** and maximum furrowing rate **(F)** in control and anillin-depleted EGFP- $\alpha$ -tubulin cells. Mean  $\pm$  SE of  $\geq 6$  cells from two independent experiments per condition. Asterisk indicates a statistically significant difference ( $p < 0.001$ ,  $t$ -test). Scale bars, 5  $\mu\text{m}$ .

## Figure S6

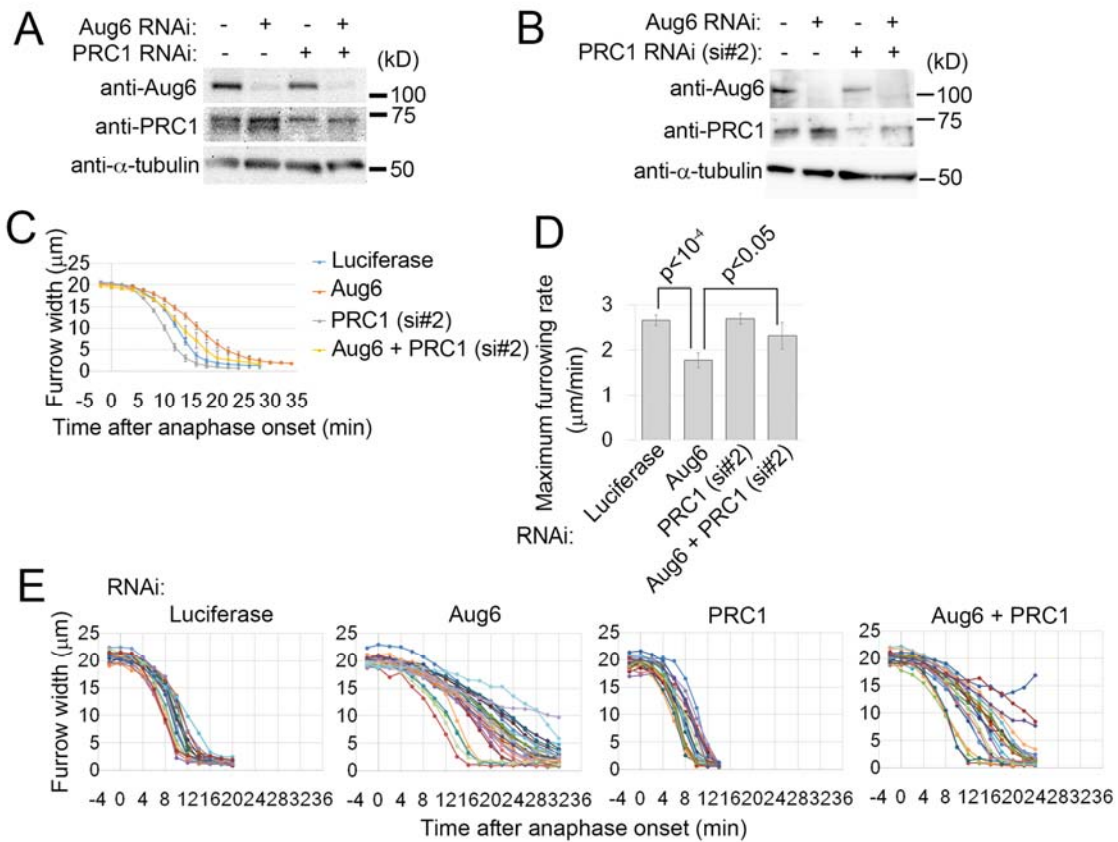

### Figure S6: Formation of peripheral MT bundles in Aug6-depleted cells

(A, B) Immunoblotting against RNAi-treated HeLa cell extracts using anti-Aug6 or PRC1 antisera. PRC1 was depleted with siRNA#1 in A, and siRNA#2 in B. Endogenous  $\alpha$ -tubulin was used as a loading control. (C,D) Time plot of furrow width change (C) and

maximum furrowing rate (**D**) in RNAi-treated EGFP- $\alpha$ -tubulin cells. Mean  $\pm$  SE of  $\geq 8$  cells from three independent experiments per condition (p value of the *t*-test). (**E**) Raw data for the time plot shown in Figure 5D.

## Figure S7

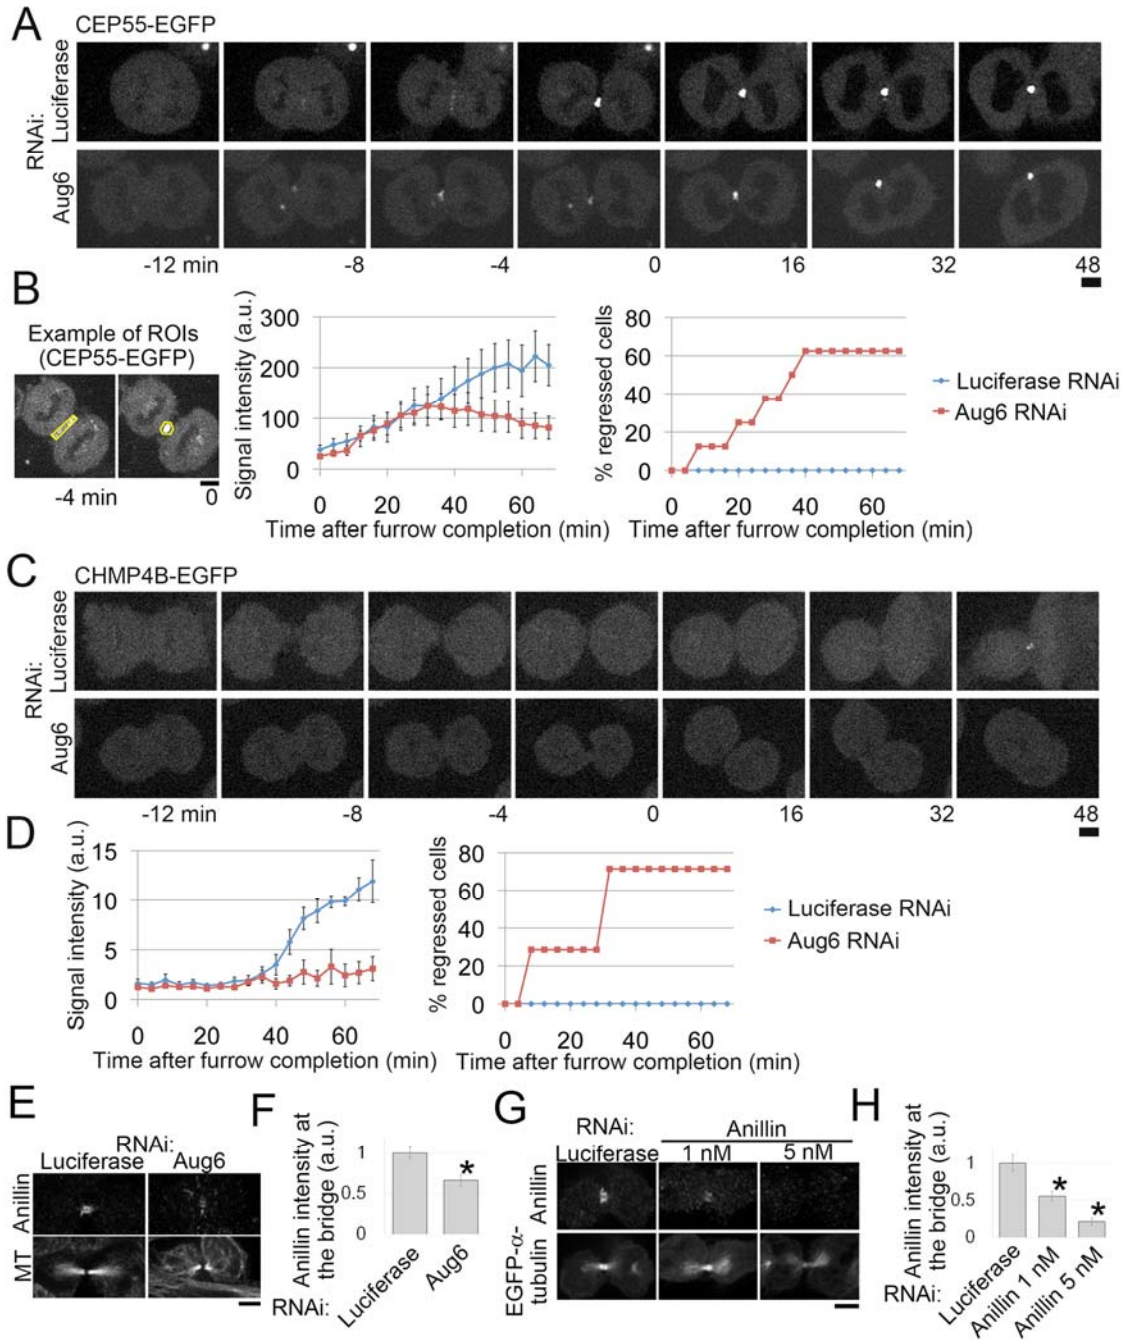

Figure S7 (continued)

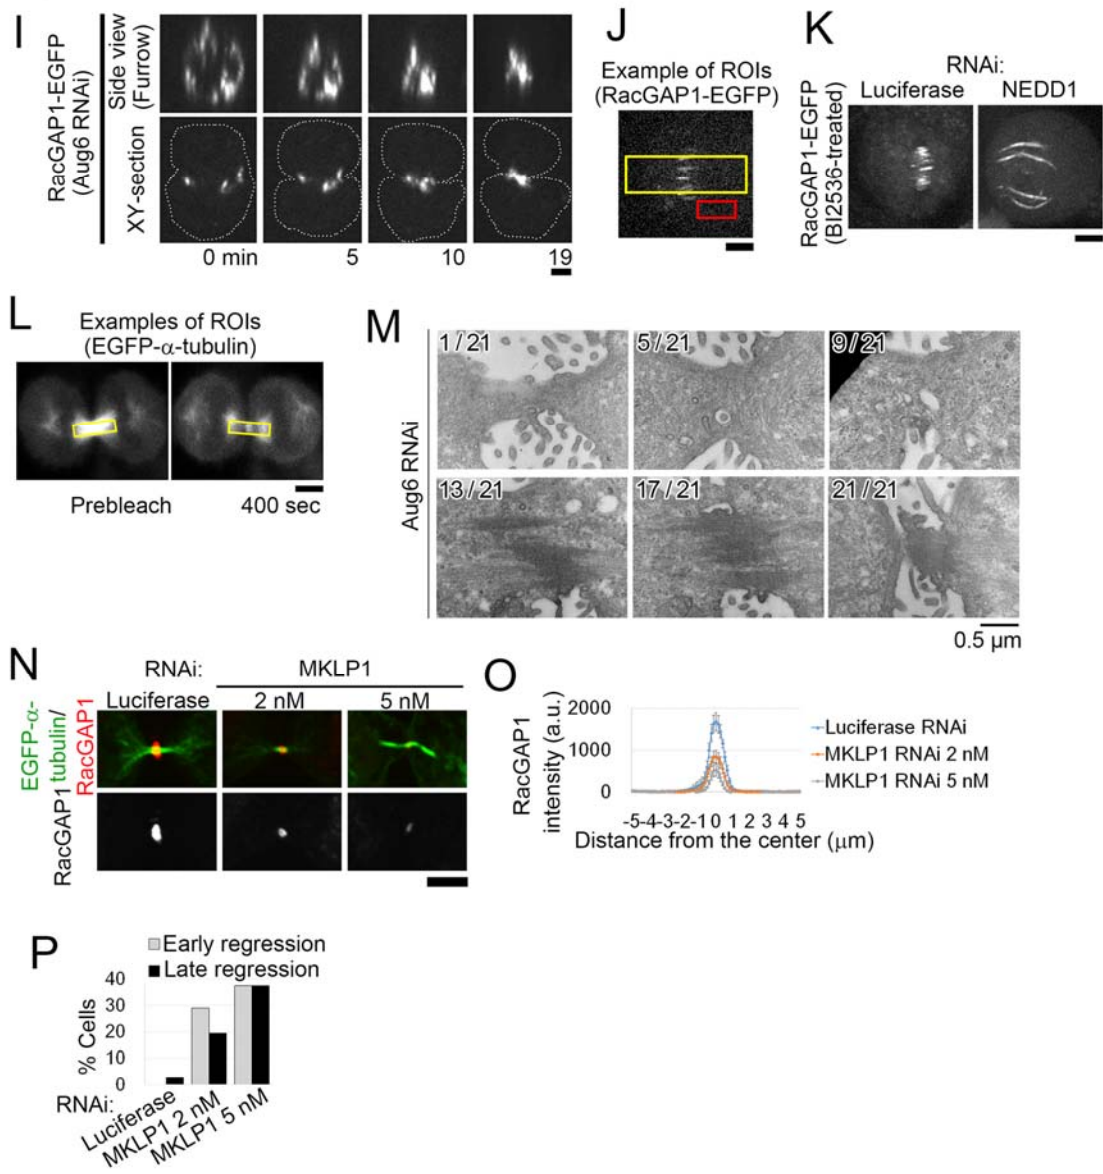

**Figure S7: Late cytokinesis defects in Aug6-depleted cells**

(A, C) Time-lapse images of RNAi-treated CEP55-EGFP (A) or CHMP4B-EGFP (C) cells. Time of furrowing completion was set at 0 min. (B, D) Time plot of GFP signal intensity (mean  $\pm$  SE) at the intercellular bridge or a cumulative curve of regression

frequency after furrowing completion in RNAi-treated CEP55-EGFP or CHMP4B-EGFP cells ( $\geq 8$  cells from four independent experiments in **B**, or  $\geq 7$  cells from two independent experiments per condition in **D**). Examples of ROIs used for the quantification are shown on the left in **B**. (**E, G**) Immunostaining for anillin and MTs (**E**) or EGFP- $\alpha$ -tubulin (**G**) in RNAi-treated cells. (**F, H**) Normalized intensity of anillin staining at the intercellular bridge in **E**(**F**) or **G** (**H**). Mean  $\pm$  SE of  $\geq 21$  cells (**F**) or  $\geq 7$  cells (**H**) from two independent experiments per condition. Asterisks indicate statistically significant differences ( $p < 0.01$  in **F**, and  $p < 0.001$  in **H**, *t*-test). (**I**) ZX-plane projection (at the cleavage furrow area) and XY-plane confocal section of a RacGAP1-EGFP cell depleted of Aug6. (**J, L**) Examples of ROIs used in the quantification shown in Figure 7F (**J**) or 7H(**L**). (**K**) Control and NEDD1-depleted RacGAP1-EGFP cells treated with MG132 and BI2536 for 40 min before fixation. (**M**) Serially sectioned TEM images of the intercellular bridge in an augmin-depleted cell. Numbers indicate each section (per total sections: each section was 75 nm thick). (**N**) Immunostaining for RacGAP1 in control or MKLP1-depleted EGFP- $\alpha$ -tubulin cells. (**O**) Line profiles of RacGAP1 immunostaining intensity along the division axes in control and MKLP1-depleted EGFP- $\alpha$ -tubulin cells. Mean  $\pm$  SE of  $\geq 10$  cells from two independent experiments per condition. (**P**) Frequencies of cytokinesis defects in control or MKLP1-depleted cells. At least 31 cells from two independent experiments per condition were analyzed. Scale bars, 5  $\mu$ m, except for **M**.
